# Supplementary material for: Assessing the net financial benefits of employing digital endpoints in clinical trials
Source: PubMed Central journal article supplement — Clin Transl Sci. 2024 Jul 28;17(8):e13902. doi: 10.1111/cts.13902 (PMC11284240; doi:10.1111/cts.13902), 2024-07-28
Supplement: CTS-17-e13902-s001.pdf [file CTS-17-e13902-s001.pdf]

**SUPPLEMENTAL DATA FILE**

**ASSESSING THE NET FINANCIAL BENEFITS OF EMPLOYING DIGITAL  
ENDPOINTS IN CLINICAL TRIALS**

**Joseph A. DiMasi,<sup>1</sup> Abigail Dirks,<sup>1</sup> Zachary Smith,<sup>1</sup> Sarah Valentine,<sup>2</sup> Jennifer C. Goldsack,<sup>2</sup> Thomas Metcalfe,<sup>3</sup> Upinder Grewal,<sup>4</sup> Lada Leyens,<sup>5</sup> Ute Conradi,<sup>6</sup> Daniel Karlin,<sup>7</sup> Lesley Maloney,<sup>8</sup> Kenneth A. Getz,<sup>1</sup> Bert Hartog<sup>9</sup>**

<sup>1</sup> Tufts Center for the Study of Drug Development, Tufts University

<sup>2</sup> Digital Medicine Society

<sup>3</sup> F. Hoffmann-La Roche Ltd.

<sup>4</sup> Bayer AG

<sup>5</sup> Takeda Pharmaceutical Company Limited

<sup>6</sup> UCB S.A.

<sup>7</sup> MindMed Inc.

<sup>8</sup> Genentech Inc.

<sup>9</sup> Janssen-Cilag B.V.

## **I. DATA AND METHODS SUPPLEMENT**

Among the variables in the DiMe Library of Digital Endpoints dataset examined for our analyses were the ClinicalTrials.gov identifying number (NCT number), if one existed, the trial study phase, trial indication, date the trial was first registered, digital endpoint, digital endpoint positioning (primary, secondary, exploratory, label claim, other), digital technology type, product type (drug, biologic, device) and trial sponsor. We placed each endpoint record in a broad therapeutic area depending on the listed indication.

The variables in the ClinicalTrials.gov registry that we examined included NCT number, trial study phase, trial start date (the actual date on which the first participant was enrolled in the study), trial primary completion date (date on which the last participant in a clinical study was examined or received an intervention to collect final data for all primary outcome measures), trial enrollment, trial condition (i.e., indication), intervention type (drug, biologic, device, and other types), intervention name, sponsor class (industry, NIH, other federal agency, other governments, network, other sponsor types), lead or collaborator (whether the sponsor class value is for the lead sponsor or is a collaborator, sponsor name, study type (interventional, observational, observational with patient registry, and expanded access), number of countries involved (overall and by region), and the number of trial sites (overall and by region). Data from the DiMe Library of Endpoints and the ClinicalTrials.gov datasets were merged for analysis by the NCT identifier.

**II. DIGITAL ENDPOINT LANDSCAPE AND MODEL PARAMETERIZATION:  
FIGURES AND TABLES**

**Figure S1. Therapeutic Class Distribution for Trials with Digital Endpoints**

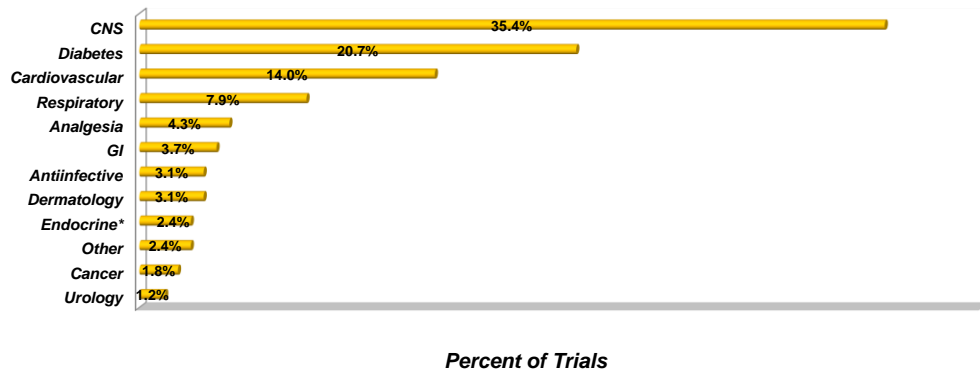

\* Excludes diabetes trials  
n = 164 trials

**Figure S2. Distribution of Number of Countries per Trial in ClinicalTrials.gov and DiMe Digital Endpoints Data**

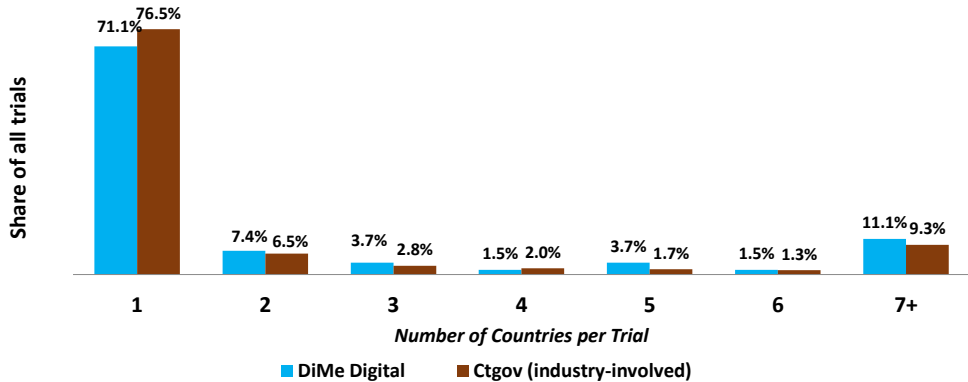

DiMe digital: n = 135 trials  
 ClinicalTrials.gov (industry-involved): n = 126,339 trials

**Figure S3. Mean Number of Countries per Trial in ClinicalTrials.gov and DiMe Digital Endpoints Data**

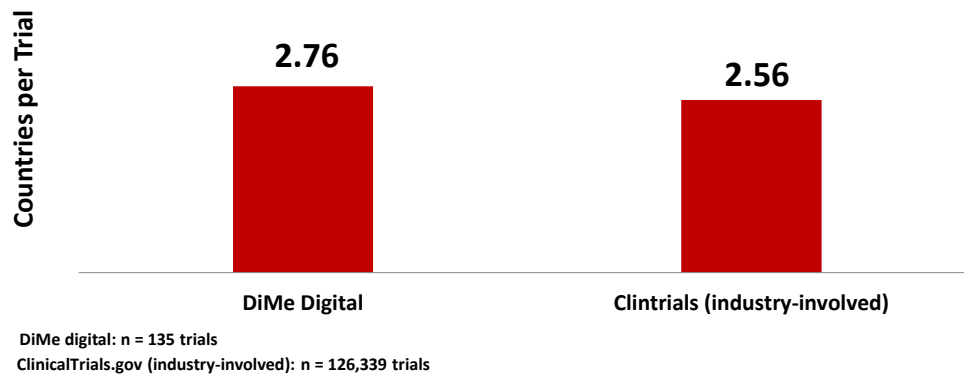

**Figure S4. Single Country Share of Trials in ClinicalTrials.gov by Trial Phase**

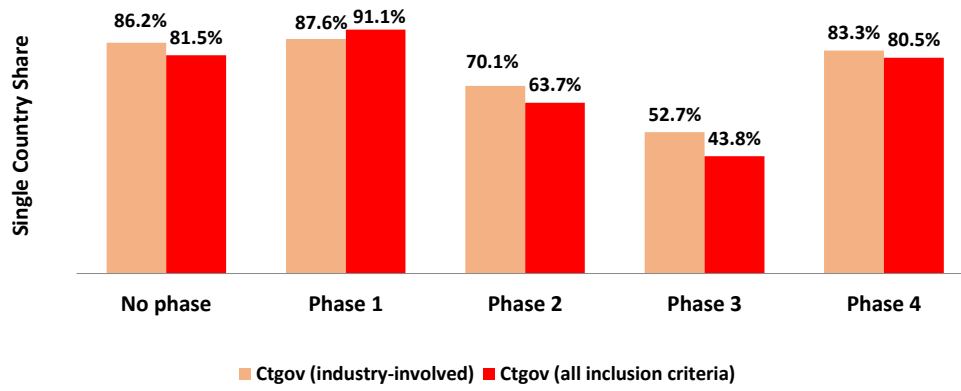

ClinicalTrials.gov (industry-involved): n = 126,339 trials  
ClinicalTrials.gov (all inclusion criteria): n = 10,394 trials



**Figure S5. Mean Number of Countries per Trial in ClinicalTrials.gov**

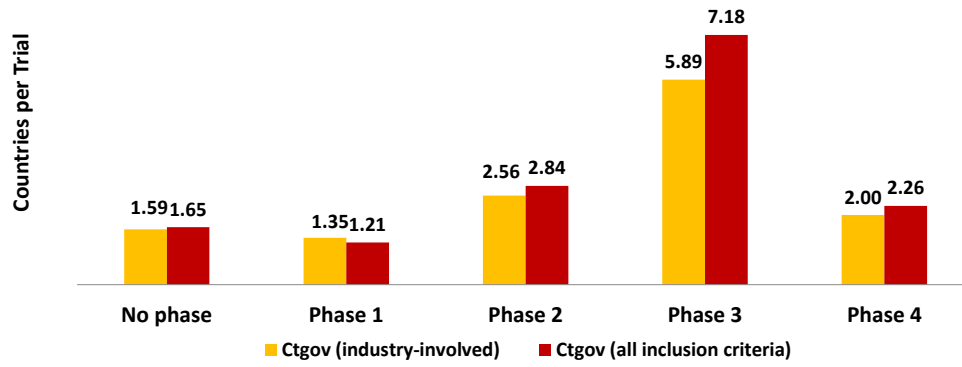

Clinicaltrials.gov (industry-involved): n = 126,339 trials  
Clinicaltrials.gov (all inclusion criteria): n = 10,394 trials

**Figure S6. Geographic Distribution of Trials in DiMe Digital Endpoints and ClinicalTrials.gov Data by Region**

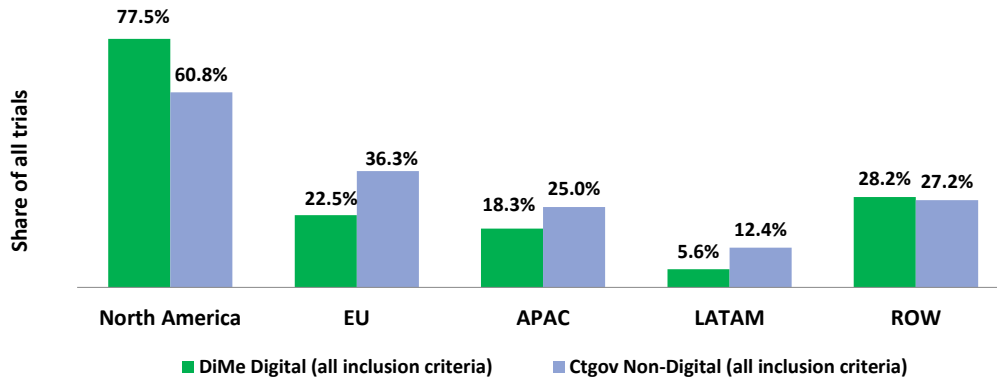

DiMe digital (all inclusion criteria): n = 71 trials  
 ClinicalTrials.gov (all inclusion criteria): n = 10,399 trials

Percentages add to more than 100 because some trials are multi-regional

**Figure S7. Distribution of Number of Regions per Trial for DiMe Digital Endpoints and ClinicalTrials.gov Data**

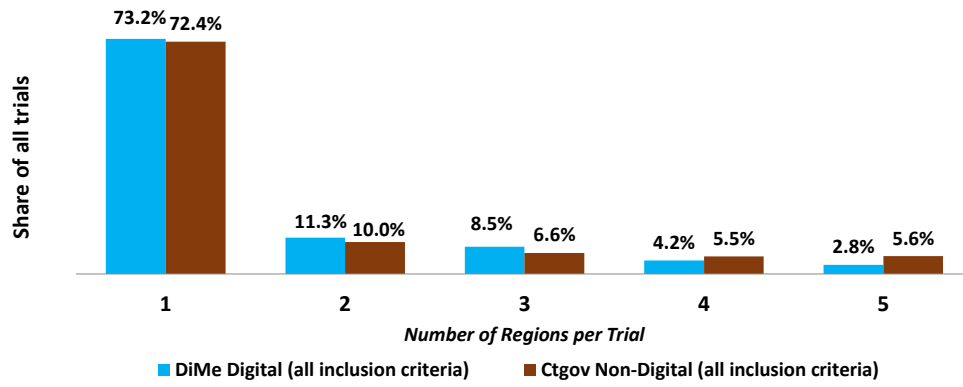

DiMe digital (all inclusion criteria): n = 71 trials  
 ClinicalTrials.gov (all inclusion criteria): n = 10,399 trials

**Figure S8. Distribution of Digital Endpoints by Trial Outcome Positioning**

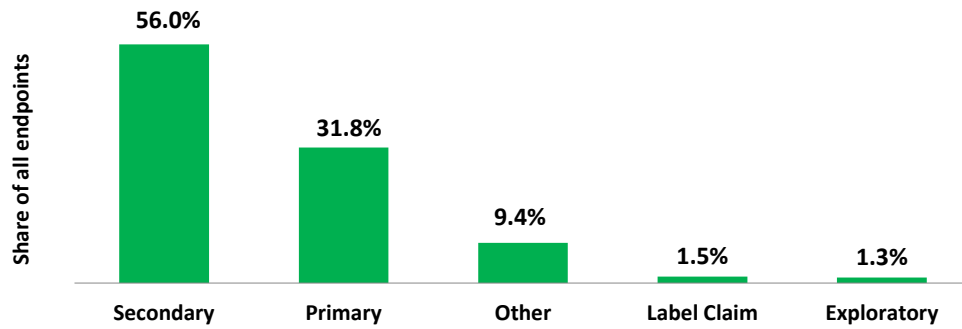

n = 363 digital endpoints

**Figure S9. Distribution of Technology Types Used to Measure Digital Endpoints**

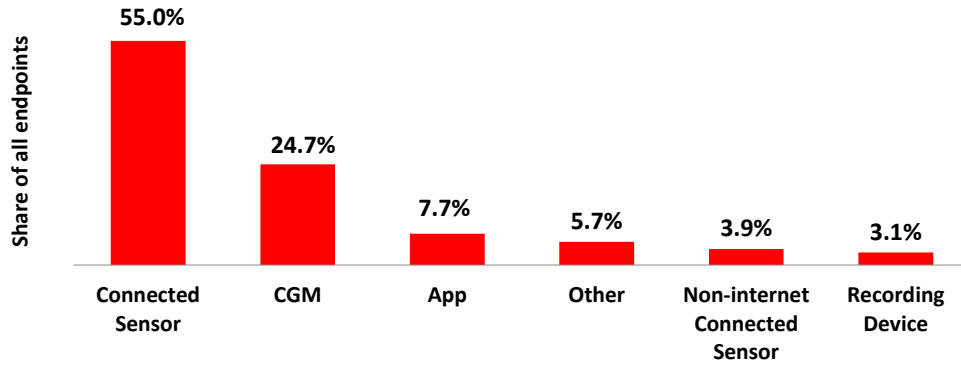

n = 389 digital endpoints

**Figure S10. Number of Digital Endpoints per Trial**

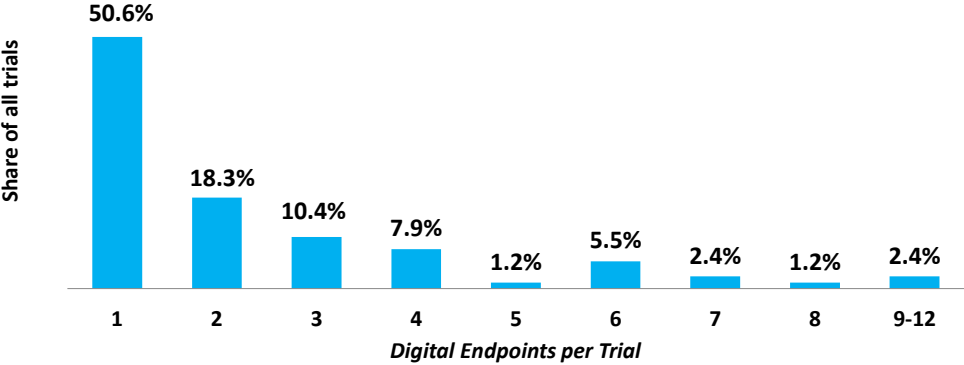

n = 164 trials

**Figure S11. Number of Sites per Trial in ClinicalTrials.gov and DiMe Digital Endpoints Data**

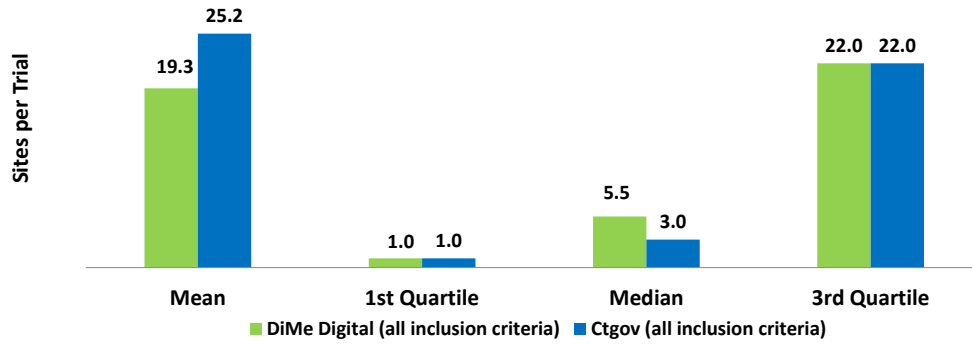

DiMe digital: n = 72 trials  
ClinicalTrials.gov: n = 10,408 trials

**Figure S12. Number of Sites per Trial in ClinicalTrials.gov and DiMe Digital Endpoints Data (extreme outliers excluded – IQR rule)**

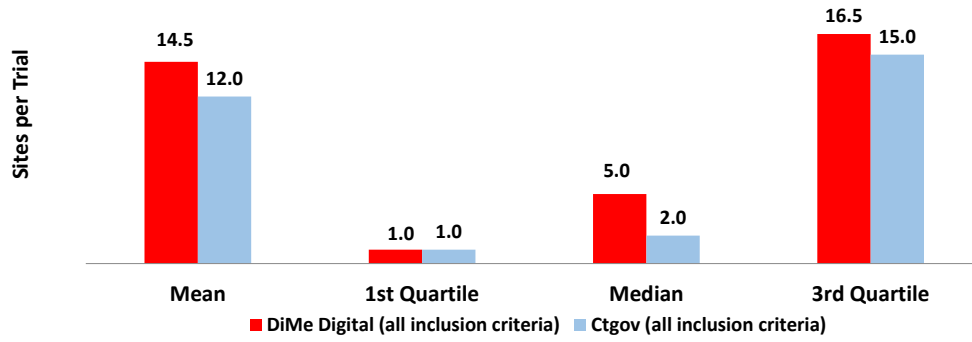

DiMe digital: n = 68 trials  
ClinicalTrials.gov: n = 9,602 trials



**Figure S13. Total Number of Endpoints per Trial in ClinicalTrials.gov and DiMe Digital Endpoints Data**

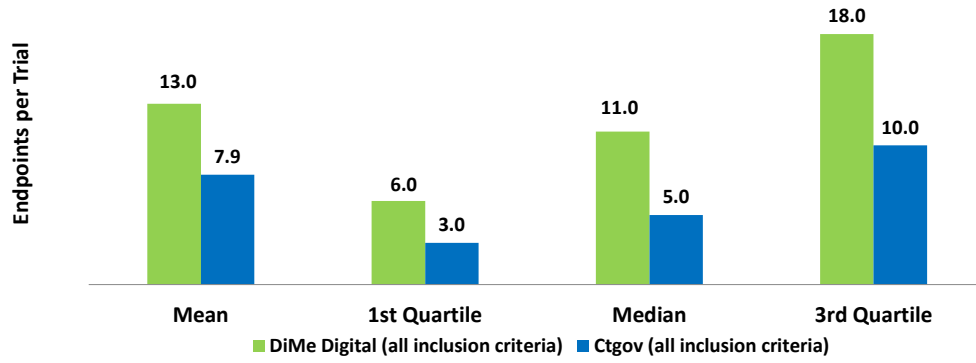

DiMe digital: n = 79 trials  
ClinicalTrials.gov: n = 11,363 trials

**Figure S14. Total Number of Endpoints per Trial in ClinicalTrials.gov and DiMe Digital Endpoints Data (extreme outliers excluded – IQR rule)**

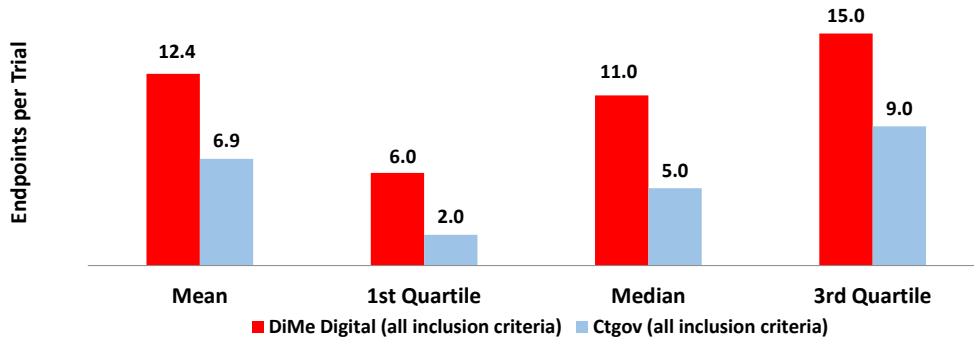

DiMe digital: n = 78 trials  
ClinicalTrials.gov: n = 11,104 trials

Table S1. Final Model Regression Coefficients for Trial Time and Size by Phase

|                              | Dependent Variable           |                              |                             |                              |
|------------------------------|------------------------------|------------------------------|-----------------------------|------------------------------|
|                              | Log of phase 2 duration      | Log of phase 3 duration      | Phase 2 enrollment          | Log of phase 3 enrollment    |
| <b>Explanatory variables</b> |                              |                              |                             |                              |
| Intercept                    | 2.2402                       | 2.53354                      | 167.12977                   | 5.48882                      |
| Digital                      | -0.27431                     | -0.24874                     | -15.23932                   | -0.12445                     |
| CNS                          | 0.24135                      | 0.27220                      | -21.5209                    | -0.12081                     |
| Cardio                       | 0.07549                      | 0.18121                      | -37.85677                   | -0.54550                     |
| Year                         | 0.02228                      | 0.01915                      | -2.98029                    | 0.01075                      |
| Sites                        | 0.00377                      | 0.00135                      | ---                         | ---                          |
| Endpoints                    | ---                          | 0.00281                      | 0.54203                     | 0.01196                      |
|                              | N=1,192; F=16.2;<br>p<0.0001 | N=1,303; F=31.5;<br>p<0.0001 | N=1,244; F=9.7;<br>p<0.0001 | N=1,378; F=14.1;<br>p<0.0001 |

**Table S2. Mean Values for Continuous Independent Variables for Cycle Time and Trial Size Regressions for Phase 2 and Phase 3**

|         | <i>Cycle Time</i> |                     |       |
|---------|-------------------|---------------------|-------|
|         | Number of sites   | Number of endpoints | Year* |
| Phase 2 | 18.5              | 9.0                 | 13.8  |
| Phase 3 | 73.9              | 10.4                | 12.6  |
|         | <i>Trial Size</i> |                     |       |
|         | Number of Sites   | Number of Endpoints | Year* |
| Phase 2 | 16.8              | 8.9                 | 13.6  |
| Phase 3 | 57.0              | 10.2                | 12.2  |

\* 2005 = year 0

**Figure S15. Sponsor Costs from Implementing, Developing, and Validating Digital Endpoints in Clinical Trials (2023 \$)**

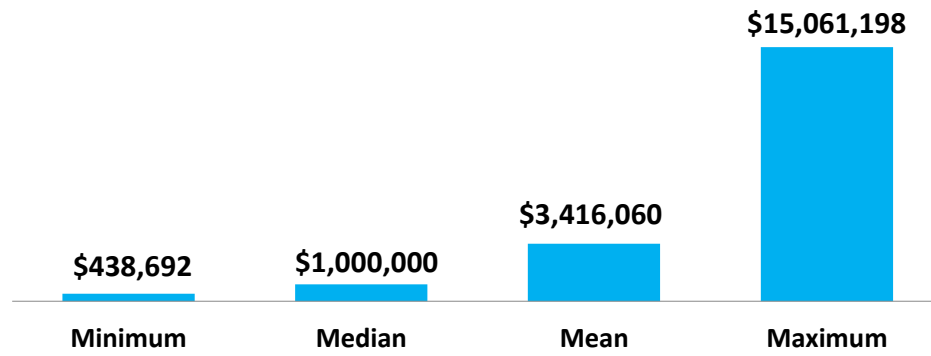

n = 11

### Table S3. Key Parameters and Data Sources

| Parameter                         | Data Source                                                                  | Parameter                            | Data Source                                               |
|-----------------------------------|------------------------------------------------------------------------------|--------------------------------------|-----------------------------------------------------------|
| Development and review times      | DiMasi et al., <i>J Health Econ</i> 2016;47:20-33 and CSDD protocol database | Peak sales and years to peak         | Cortellis pipeline database (consensus analyst forecasts) |
| Development costs                 | DiMasi et al., <i>J Health Econ</i> 2016;47:20-33 and CSDD protocol database | Effective tax rate                   | Public financial data for top 10 pharma firms             |
| Phase success rates               | BIO/Informa/QLS, Feb 2021                                                    | Digital endpoint implementation cost | CSDD/DiMe Sponsor and Developer Cost Survey               |
| Cost of capital                   | DiMasi et al., <i>J Health Econ</i> 2016;47:20-33                            | Change in trial duration             | ClinicalTrials.gov and DiMe databases                     |
| Approved supplemental indications | Drugs@FDA                                                                    | Change in trial size                 | ClinicalTrials.gov and DiMe databases                     |

**Figure S16. Mean Number of FDA-approved Indications by Therapeutic Area and Approval Period**

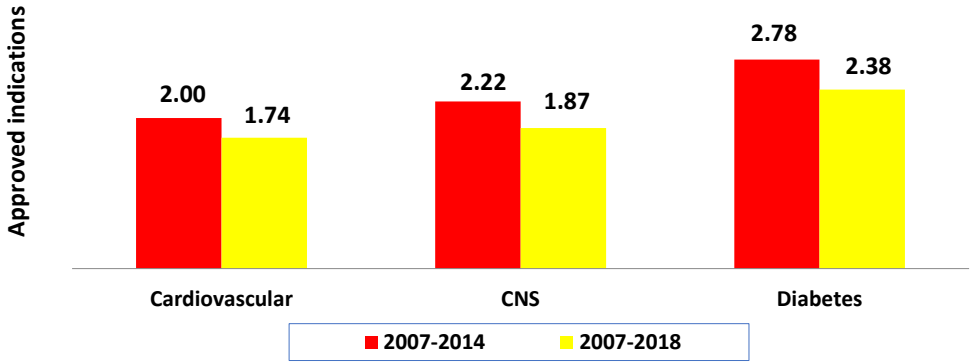

**Table S4. Development Risk Parameter Values for eNPV Analysis (indication transition probabilities)**

| <b>Transition</b>             | <b>Cardiovascular</b> | <b>Endocrine</b> | <b>Neurology</b> |
|-------------------------------|-----------------------|------------------|------------------|
| Phase 2 to Phase 3            | 21.0%                 | 26.6%            | 26.8%            |
| Phase 3 to Regulatory Review  | 55.2%                 | 66.2%            | 53.1%            |
| Regulatory Review to Approval | 82.5%                 | 86.3%            | 86.7%            |
| Phase 2 to Approval           | 9.6%                  | 15.2%            | 12.3%            |
| Phase 3 to Approval           | 45.5%                 | 57.1%            | 46.0%            |

Source: Clinical Development Success Rates and Contributing Factors, 2011-2020, Biotechnology Innovation Organization (BIO), Informa Pharma Intelligence, QLS Advisors, url: <https://www.bio.org/clinical-development-success-rates-and-contributing-factors-2011-2020>



**Table S5. Relative\* Clinical Phase to Phase Durations and Phase R&D Costs**

|                                                   | <b>Cardiovascular</b> | <b>Diabetes</b> | <b>CNS</b> |
|---------------------------------------------------|-----------------------|-----------------|------------|
| Phase 2 to Phase 3<br>relative duration           | 90.4%                 | 98.9%           | 102.0%     |
| Phase 3 to regulatory<br>review relative duration | 110.5%                | 76.1%           | 95.0%      |
| Phase 2 relative cost                             | 94.9%                 | 97.1%           | 163.1%     |
| Phase 3 relative cost                             | 46.8%                 | 62.9%           | 119.7%     |

\* Relative to overall averages for drug in general

Source for overall averages and relative durations and costs: DiMasi et al., *Journal of Health Economics* 2016;47:20-33 and Tufts CSDD Protocol Complexity Benchmark Database

### **III. SENSITIVITY ANALYSES**

Figures S17 and S18 show ROI at varying assumed reductions in trial durations holding base case reductions in trial size constant for phase 2 and phase 3 trials and by therapeutic area. We also examined the sensitivity of ROI for varying assumptions about percentage reductions in trial sizes, holding base case reductions in phase duration constant for phase 2 and phase 3 trials and by therapeutic area (Figures S19 and S20). In this way, we can isolate the effects on financial value for the two types of benefit.

The results show generally higher ROIs for diabetes indications compared to cardiovascular and CNS indications. The exceptions are phase 2 reductions in trial sizes, holding phase duration constant, for high assumed percentage reductions in trial sizes (30% or more in relation to CNS trials). ROIs for phase 3 trials are at least twice the investment cost for trial size variation. For phase 2, with the exception of CNS trials, at very low reductions in phase duration or trial size (one month for phase duration reduction and 5% for trial size reduction) the ROIs become zero or negative. Finally, the ROIs are much higher in all cases, and uniformly positive, if median implementation cost is used in the modeling.

Figure S17. Phase 2 digital endpoint ROI by reduction in trial duration (at base case decrease in trial size and mean implementation cost)

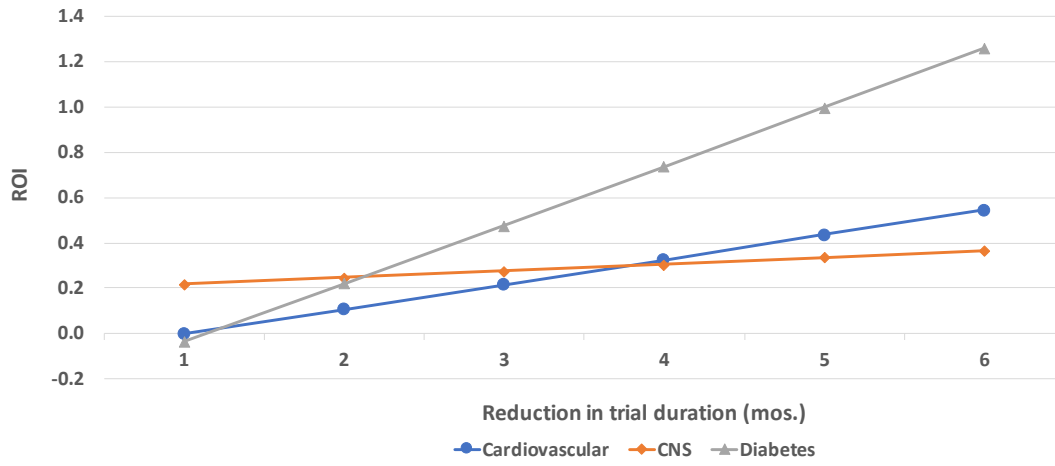

Figure S18. Phase 2 digital endpoint ROI by percentage reduction in trial size  
(at base case decrease in trial duration and mean implementation cost)

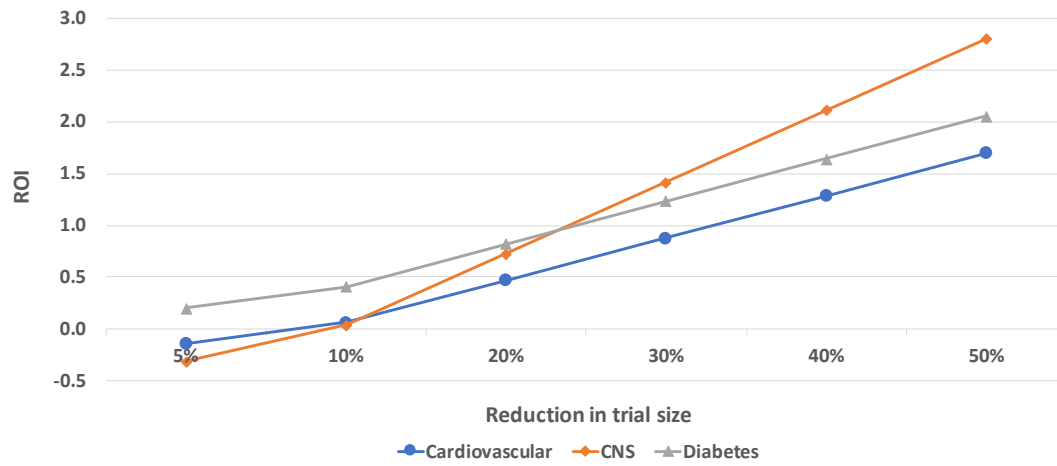

Figure S19. Phase 3 digital endpoint ROI by reduction in trial duration (at base case decrease in trial size and mean implementation cost)

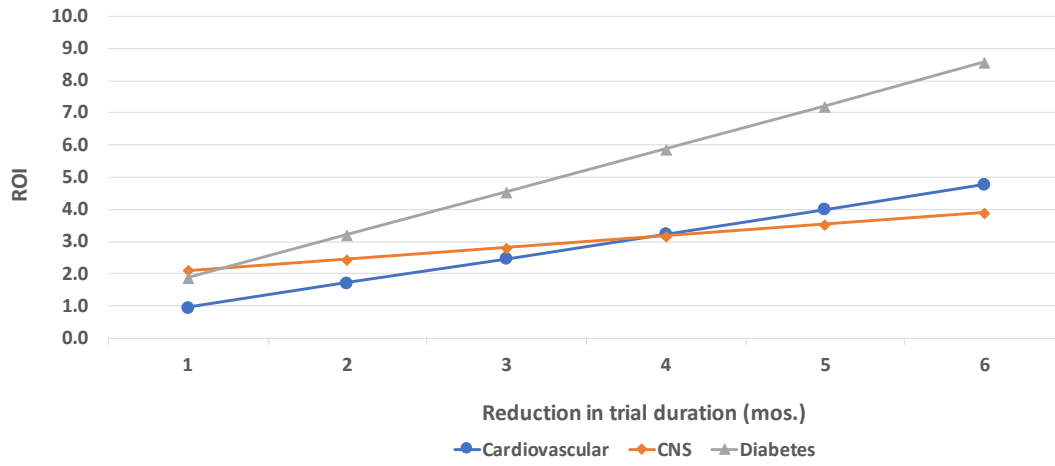

Figure S20. Phase 3 digital endpoint ROI by percentage reduction in trial size (at base case decrease in trial duration and mean implementation cost)

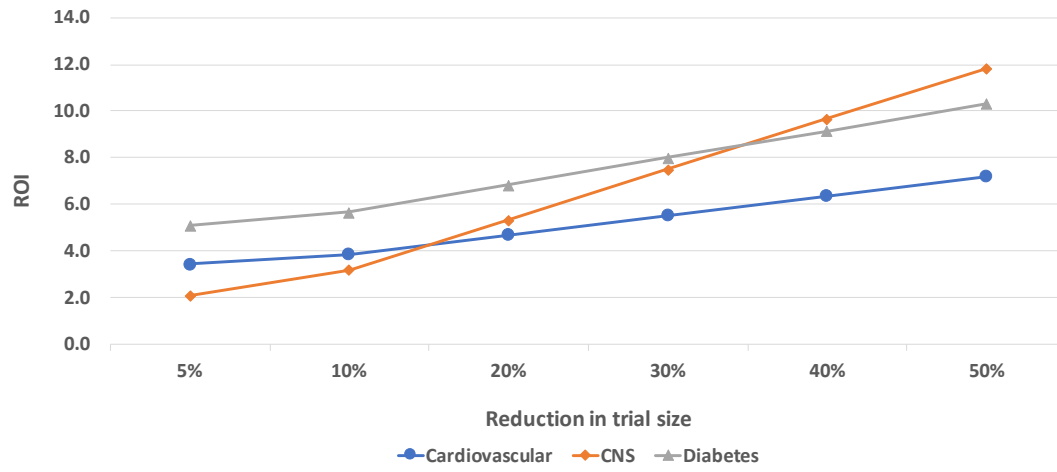

**Table S6. eNPV Delta (thousands 2023 USD) by Therapeutic Area and Clinical Phase for Varying Assumptions About the Number of Pre-Approval Investigational Indications**

| Clinical Phase | Pre-Approval Indications | Therapeutic Area      |            |                 |
|----------------|--------------------------|-----------------------|------------|-----------------|
|                |                          | <i>Cardiovascular</i> | <i>CNS</i> | <i>Diabetes</i> |
| <i>Phase 2</i> |                          |                       |            |                 |
|                | 1                        | \$5,350               | \$5,832    | \$5,125         |
|                | 2                        | \$2,215               | \$2,087    | \$3,256         |
|                | 3                        | \$1,103               | \$721      | \$2,570         |
| <i>Phase 3</i> |                          |                       |            |                 |
|                | 1                        | \$28,525              | \$22,256   | \$44,623        |
|                | 2                        | \$33,279              | \$27,343   | \$48,404        |
|                | 3                        | \$34,413              | \$28,597   | \$49,374        |

Base case: Two pre-approval investigational indications



**Table S7. Return on Investment (ROI) by Therapeutic Area and Clinical Phase for Varying Assumptions About the Number of Pre-Approval Investigational Indications**

| <b>Clinical Phase</b> | <b>Pre-Approval Indications</b> | <b>Therapeutic Area</b> |            |                 |
|-----------------------|---------------------------------|-------------------------|------------|-----------------|
| <i>Phase 2</i>        |                                 | <i>Cardiovascular</i>   | <i>CNS</i> | <i>Diabetes</i> |
|                       | 1                               | 78.3%                   | 85.4%      | 75.0%           |
|                       | 2                               | 32.4%                   | 30.5%      | 47.7%           |
|                       | 3                               | 16.1%                   | 10.6%      | 37.6%           |
| <i>Phase 3</i>        |                                 |                         |            |                 |
|                       | 1                               | 4.2x                    | 3.3x       | 6.5x            |
|                       | 2                               | 4.9x                    | 4.0x       | 7.1x            |
|                       | 3                               | 5.1x                    | 4.2x       | 7.3x            |

Base case: Two pre-approval investigational indications
